# Supplementary material
Source: publisher site journal article supplement (https://static.cambridge.org/content/id/urn:cambridge.org:id:article:S0022050717000791/resource/name/S0022050717000791_supp1.docx)
Supplement: Supplementary file 1 [file S0022050717000791_supp1.docx]

*Online Appendix*

*World War II and the Industrialization of the American South*

Figure A1

PREWAR MANUFACTURING RELATIVE TO WARTIME II INVESTMENT

*Notes*: Each point indicates a county with given share of value-added by manufacturing in 1939 and given share of war-related investment. The solid (empty) dots indicate counties from southern (non-southern) states; solid (dashed) lines indicate the best linear fit through the southern (non-southern) dots. The different panels restrict attention to counties with different levels of manufacturing activity and war-related investment.

*Sources*:Data on the value-added by manufacturing in 1939 and wartime investment are drawn from Haines (2010).

Figure A2

IMPACT OF WARTIME INVESTMENT ON MANUFACTURING (IN LEVELS)

*Notes*: Each panel plots regression coefficients on the level of wartime investment a specification similar to equation (1) with level of the number establishments, employment, wage bill, and value- added as the dependent variable. Each panel shows coefficients and the 95 percent confidence interval from a specification that includes state-year fixed effects, county fixed effects, and county-level controls (interacted with year fixed effects). The 95 percent confidence interval is based on standard errors clustered at the state level. The number of sample counties is 1,086.

*Sources*: See text of the Data and Variables section.

Figure A3

IMPACT OF WARTIME SUPPLY CONTRACTS ON MANUFACTURING

*Notes*: Each panel plots regression coefficients on log of supply contracts from versions of equation (1) with the log of the number establishments, employment, wage bill, and value-added as the dependent variable. The solid and dashed black lines show coefficients and the 95 percent confidence interval from a specification that includes state-year and county fixed effects as well as county-level controls (interacted with year fixed effects). The 95 percent confidence interval is based on standard errors clustered at the state level. The number of sample counties is 1,086.

*Sources*: See text of the Data and Variables section.

(A) Coefficient on

(B) Coefficient on

(C) Coefficient on

Figure A4

IMPACT OF WARTIME INVESTMENT AND THE INDUSTRIAL MOBILIZATION PLAN

*Notes*: Each panel plots a set of regression coefficients from equation (2) with the log of the number establishments, employment, wage bill, and value-added as the dependent variable. Panel A shows the coefficients and 95 percent confidence interval for , Panel B shows the coefficients on , and Panel C shows the coefficients on the interaction, . All specifications include state-year and county fixed effects as well as county-level controls (interacted with year fixed effects) The 95 percent confidence interval is based on standard errors clustered at the state level. The number of sample counties is 1,086.

*Sources*: See text of the Data and Variables section.

Table A1

Robustness for Impact of Wartime on Manufacturing

|  | (1) | (2) | (3) | (4) |
| --- | --- | --- | --- | --- |
| × 1920 | –0.0212 | –0.0418 | 0.0068 | 0.0069 |
|  | (0.0056) | (0.0170) | (0.0408) | (0.0444) |
| × 1930 | –0.0170 | –0.0272 | 0.0244 | 0.0309 |
|  | (0.0041) | (0.0101) | (0.0398) | (0.0442) |
| × 1940 | — | — | — | — |
|  |  |  |  |  |
| × 1947 | –0.0050 | 0.0082 | –0.0590 | –0.0557 |
|  | (0.0063) | (0.0129) | (0.0474) | (0.0531) |
| × 1954 | –0.0024 | –0.0034 | –0.0039 | 0.0148 |
|  | (0.0071) | (0.0206) | (0.0582) | (0.0641) |
| × 1958 | 0.0032 | 0.0044 | –0.0359 | –0.0206 |
|  | (0.0083) | (0.0158) | (0.0406) | (0.0438) |
| × 1963 | 0.0066 | 0.0059 | 0.0598 | 0.0745 |
|  | (0.0082) | (0.0174) | (0.0503) | (0.0567) |
| × 1967 | 0.0043 | –0.0317 | 0.0285 | 0.0352 |
|  | (0.0084) | (0.0358) | (0.0839) | (0.0878) |
| × 1972 | 0.0108 | –0.0039 | 0.0787 | 0.0828 |
|  | (0.0093) | (0.0189) | (0.0534) | (0.0566) |
| × 1977 | 0.0113 | –0.0090 | 0.0702 | 0.0725 |
|  | (0.0101) | (0.0223) | (0.0507) | (0.053) |
| × 1982 | 0.0141 | –0.0487 | –0.0060 | –0.0146 |
|  | (0.0120) | (0.0283) | (0.0490) | (0.0506) |
| × 1987 | 0.0092 | –0.0167 | 0.0792 | 0.0817 |
|  | (0.0112) | (0.0427) | (0.0931) | (0.0962) |

*Notes*: Each column shows the results of estimating equation (1) for the log of different manufacturing outcomes: establishments (column 1), employment (column 2), wage bill (column 3), and value-added by manufacturing (column 4). All columns are from a specification that includes state-year and county fixed effects as well as county-level controls (interacted with year fixed effects). In addition, all columns include controls for New Deal Spending under the Agricultural Adjustment Act, an indicator for whether a county was in the service territory of the Tennessee Valley Authority, and an indicator for the presence of a military base. The years included are 1920, 1930, 1940, 1947, 1954, 1958, 1963, 1967, 1972, 1977, 1982, and 1987. Standard errors (in parentheses) are clustered at the state level. The number of sample counties is 1,086.

*Sources:* See text of the Data and Variables section.
